# Supplementary material
Source: PubMed Central journal article supplement (PMC1564239)

**A** WT LAM

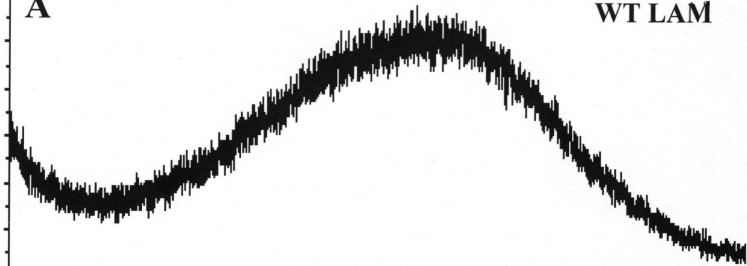

**B** mutLAM

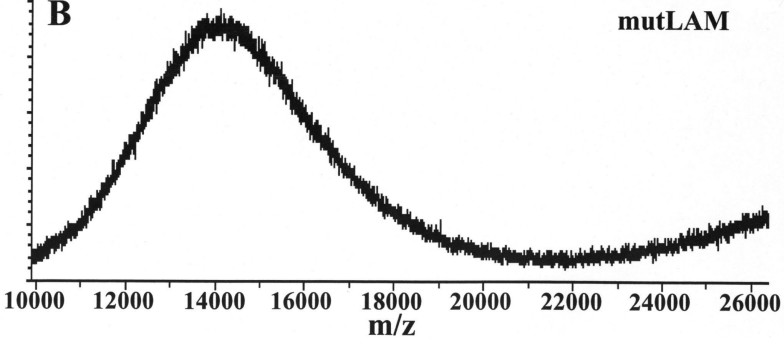

Supplement: pnas_0603049103_1.pdf [file pnas_0603049103_1.pdf]

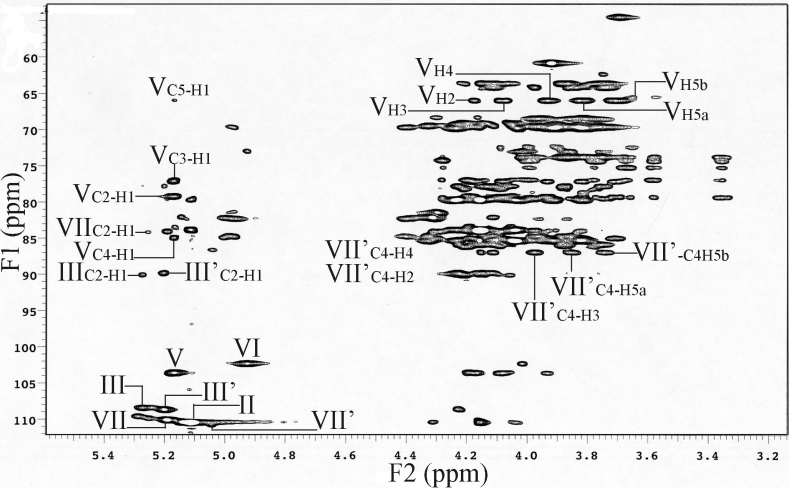

Supplement: pnas_0603049103_2.pdf [file pnas_0603049103_2.pdf]
